# Supplementary material
Source: PubMed Central journal article supplement (PMC3278085)
Supplement: NIHMS330451-supplement-02.pdf [file NIHMS330451-supplement-02.pdf]

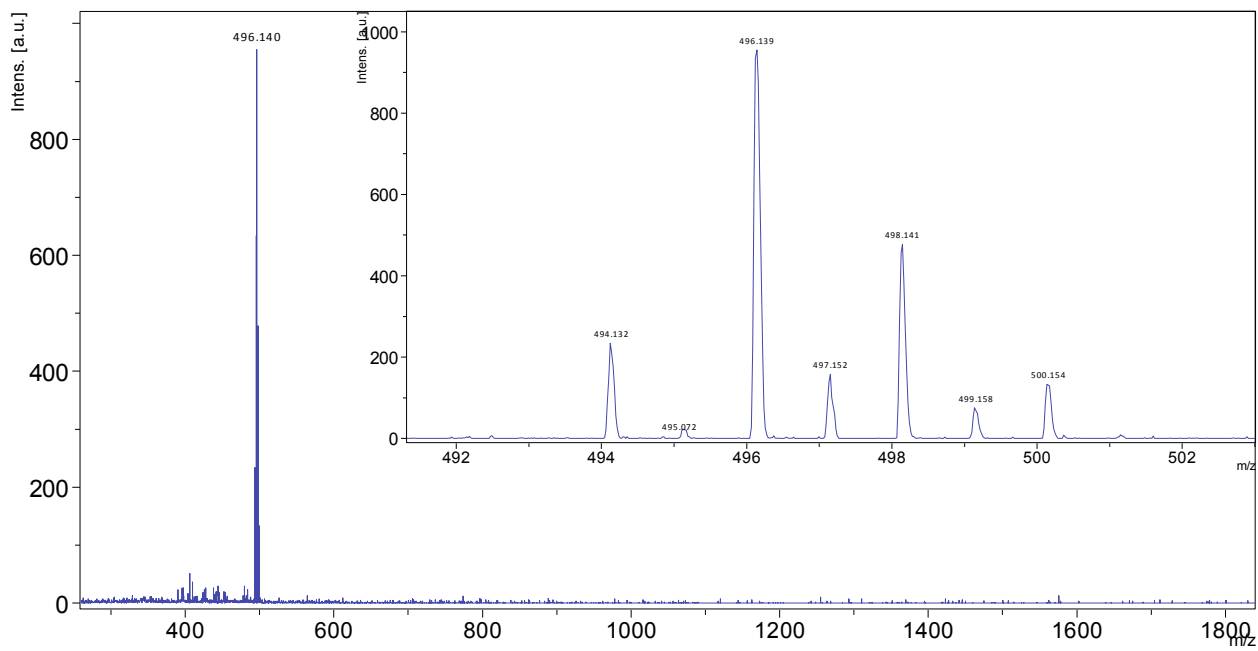

Fig. S1 LDI-MS spectrum of  $[\text{Zn}^{\text{II}}\text{LH}_4\text{N}_3\text{S}]^+$  (theor.  $m/z = 496.18$ ).

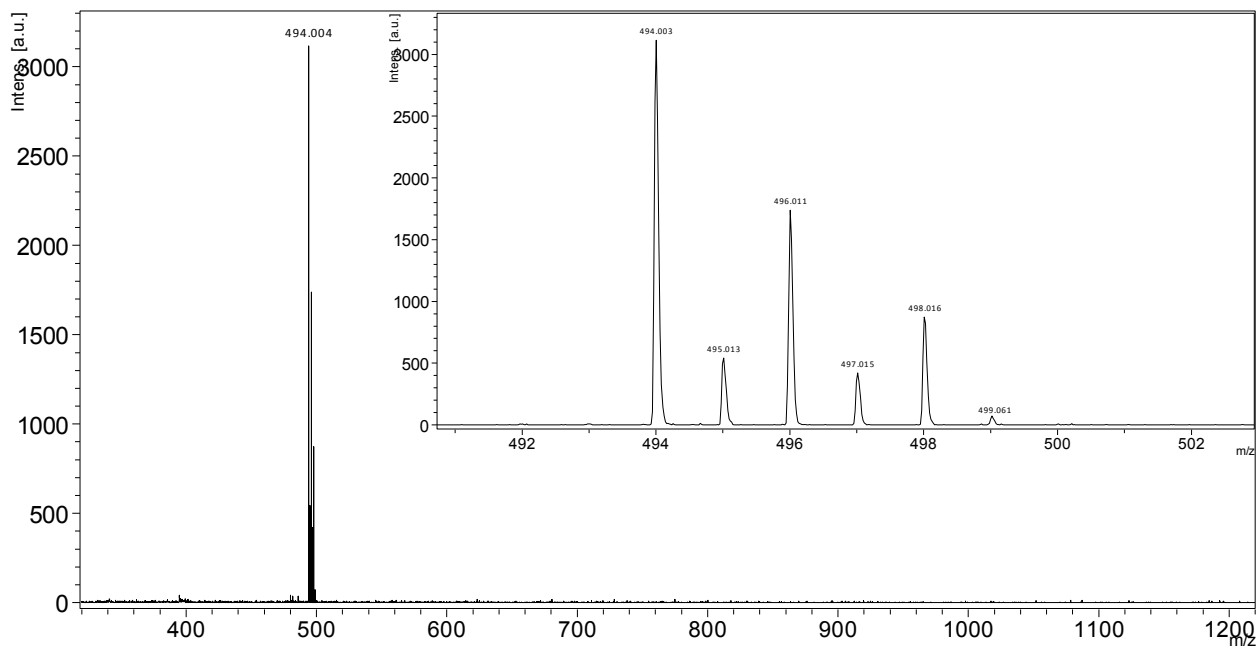

Fig. S2 LDI-MS spectrum of  $[\text{Zn}^{\text{II}}(\text{LH}_2\text{N}_3\text{S})]^+$  (theor.  $m/z = 494.16$ ).
